# Supplementary material for: Religion and global cultural diversity
Source: Research Square preprint supplement (doi:10.21203/rs.3.rs-5609419/v1), 2024-12-22
Supplement: Supplementary file 1 [file 1bc58bade3aca3919b6e6d55.docx]

Author contributions

J.S.B., L.L.S., and A.B.K. designed the study. L.L.S. did initial data processing and pre-analyses, guided by J.S.B. and A.B.K. J.S.B. and L.L.S. wrote the code. J.S.B. conducted the analyses. A.B.K. checked the code, contributed to the literature review, typesetting, and conducted some of the robustness checks. J.S.B. drafted the paper. A.N. contributed to the theory, data interpretation, and writing. All authors provided input on the methods and the manuscript.
