# Supplementary material for: Religion and global cultural diversity
Source: Research Square preprint supplement (doi:10.21203/rs.3.rs-5609419/v1), 2024-12-22
Supplement: Supplementary file 2 [file e6d3d241b95aeb6d0e400970.docx]

**Competing interests**

None of the authors have any competing interests.
